# Supplementary material for: Zn 1,3,5-benzenetricarboxylate as an efficient catalyst for the synthesis of cyclic carbonates from CO2
Source: Royal Society of Chemistry journal article supplement (doi:10.1039/c8ra00152a), 2018-01-01
Supplement: c8ra00152a1.pdf [file c8ra00152a1.pdf]

Supplementary Information for

**Zn 1,3,5-Benzenetricarboxylate as an efficient catalyst for the synthesis of cyclic carbonates from CO<sub>2</sub>**

Chao Feng, Xianglei Cao, Liugen Zhang, Changyan Guo, Naeem Akram, Jide Wang\*

Key Laboratory of Oil & Gas Fine Chemicals Ministry of Education, Xinjiang University, Urumqi 830046, Xinjiang, People's Republic of China.

\* To whom correspondence may be addressed.

Tel.: +86-0991-8582807; Fax: +86-0991-8582807.

*E-mail address:* [awangjd@sina.cn](mailto:awangjd@sina.cn) (J. Wang).

**Table of contents:**

**Table S1.** Cycloaddition of SO and CO<sub>2</sub> using catalysts or their precursors.

**Table S1** Cycloaddition of SO and CO<sub>2</sub> using catalysts or their precursors.

| Entry          | Catalyst                                              | SO Conversion (%) | SC Yield (%) |
|----------------|-------------------------------------------------------|-------------------|--------------|
| 1              | none                                                  | --                | --           |
| 2              | [Zn <sub>3</sub> (BTC) <sub>2</sub> ]                 | 26.23             | 20.93        |
| 3              | TBABr                                                 | 50.68             | 41.66        |
| 4              | [Zn <sub>3</sub> (BTC) <sub>2</sub> ]/TBABr           | 98.96             | >99          |
| 5              | Zn(acetate) <sub>2</sub> ·2H <sub>2</sub> O/TBABr     | 54.36             | 47.92        |
| 6              | BTC/ TBABr                                            | 42.12             | 33.07        |
| 7              | Zn(acetate) <sub>2</sub> ·2H <sub>2</sub> O/BTC/TBABr | 48.56             | 38.91        |
| 8 <sup>b</sup> | [Zn <sub>3</sub> (BTC) <sub>2</sub> ]                 | 86.65             | 84.32        |

Reaction conditions: SO = 20mmol, [Zn<sub>3</sub>(BTC)<sub>2</sub>] = 10mg, TBABr = 0.31×10<sup>-4</sup>mmol, Pressure = 13 bar,

Temperature = 130°C, Reaction time = 6 h.

<sup>b</sup> Pressure = 30 bar, Temperature = 160°C, Reaction time = 24 h.
